# Supplementary material for: Covalently attached graphene–ionic liquid hybrid nanomaterials: synthesis, characterization and tribological application
Source: Royal Society of Chemistry journal article supplement (doi:10.1039/c5ta08640j), 2015-11-30
Supplement: c5ta08640j1.pdf [file c5ta08640j1.pdf]

**Supporting Information**

**on**

**Covalently Attached Graphene-Ionic Liquids**

**Hybrid Nanomaterials: Synthesis, Characterization**

**and Tribological Application**

*Rashi Gusain<sup>1</sup>, Harshal P. Mungse<sup>1</sup>, Niranjana Kumar<sup>2</sup>, T.R. Ravindran<sup>2</sup>, R. Pandian<sup>2</sup>,  
Hiroyuki Sugimura<sup>3</sup>, Om P. Khatr<sup>1,\*</sup>*

## Table of Content

|           |                                                                                                                                            |    |
|-----------|--------------------------------------------------------------------------------------------------------------------------------------------|----|
| Figure S1 | : XRD patterns of GO, rGO and carboxylic enriched graphene nanosheets                                                                      | 3  |
| Figure S2 | : FESEM micrograph and corresponding element mapping images of Gr-BScB hybrid nanomaterial                                                 | 4  |
| Figure S3 | : FESEM micrograph and corresponding element mapping images of Gr-OL hybrid nanomaterial                                                   | 5  |
| Figure S4 | : FESEM micrograph and corresponding element mapping images of Gr-PF <sub>6</sub> hybrid nanomaterial                                      | 6  |
| Figure S5 | : FESEM micrograph images of worn track of steel disc lubricated with PEG and Gr-BScB blended samples                                      | 7  |
| Figure S6 | Changes in coefficient of friction as a function of individual blends of Im-BScB ionic liquid and Gr-BScB hybrid nanomaterial in PEG 200.  | 8  |
| Figure S7 | : FESEM micrograph and corresponding element mapping images of worn track of steel disc lubricated with PEG 200 lube base oil.             | 9  |
| Figure S8 | : FESEM micrograph and corresponding element mapping images of worn track of steel disc lubricated with Gr-OL blended sample.              | 10 |
| Figure S9 | : FESEM micrograph and corresponding element mapping images of worn track of steel disc lubricated with Gr-PF <sub>6</sub> blended sample. | 11 |
| Table S1  | : Chemical composition of tribo-pair (Cr6 steel ball and 316 LN disc)                                                                      | 12 |
| Table S2  | : Mechanical properties of Cr6 steel ball and 316 LN disc                                                                                  | 12 |
| Table S3  | : Physicochemical properties of PEG 200 and Gr-ILs blended samples                                                                         | 13 |
| Table S4  | : Thermal % weight loss of GO, Gr-BScB, Gr-OL, and Gr-PF <sub>6</sub> as deduced from thermogravimetric pattern of respective sample       | 13 |

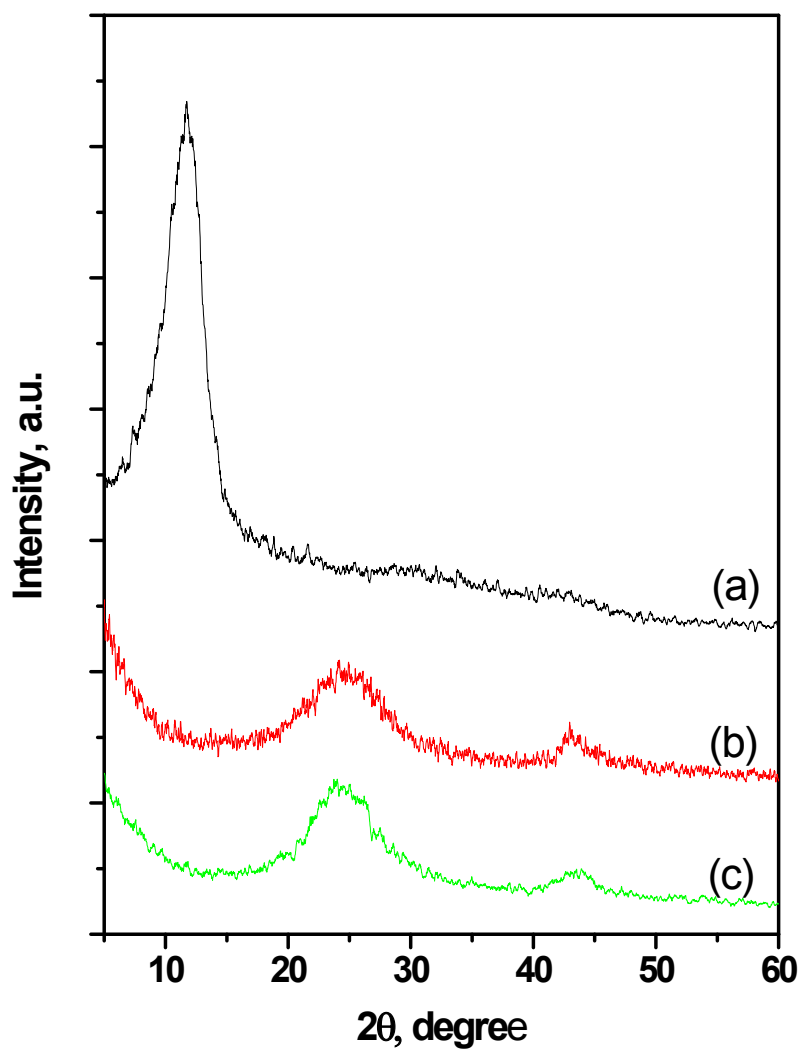

**Figure S1:** XRD patterns of (a) GO, (b) rGO, prepared by chemical reduction of GO. (c) Carboxylic group enriched graphene nanosheets, prepared by mild oxidation of rGO. XRD patterns reveals that during mild oxidation of rGO, the graphene characteristic interlayer distance remains intact.

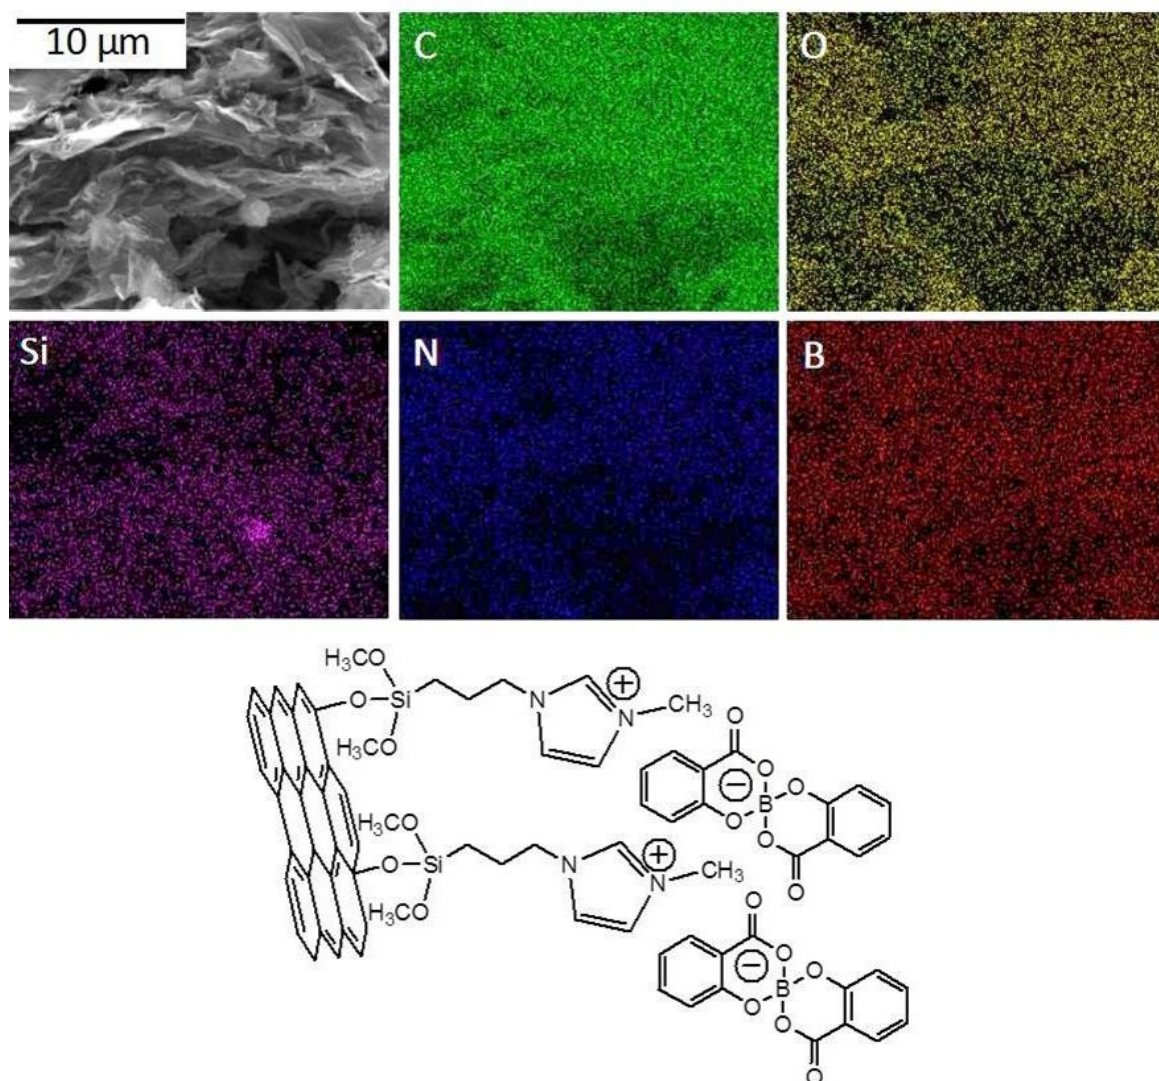

**Figure S2.** FESEM micrograph and corresponding element mapping images of Gr-BScB hybrid nanomaterial along with its representative molecular structure. The element symbol is mentioned on each image.

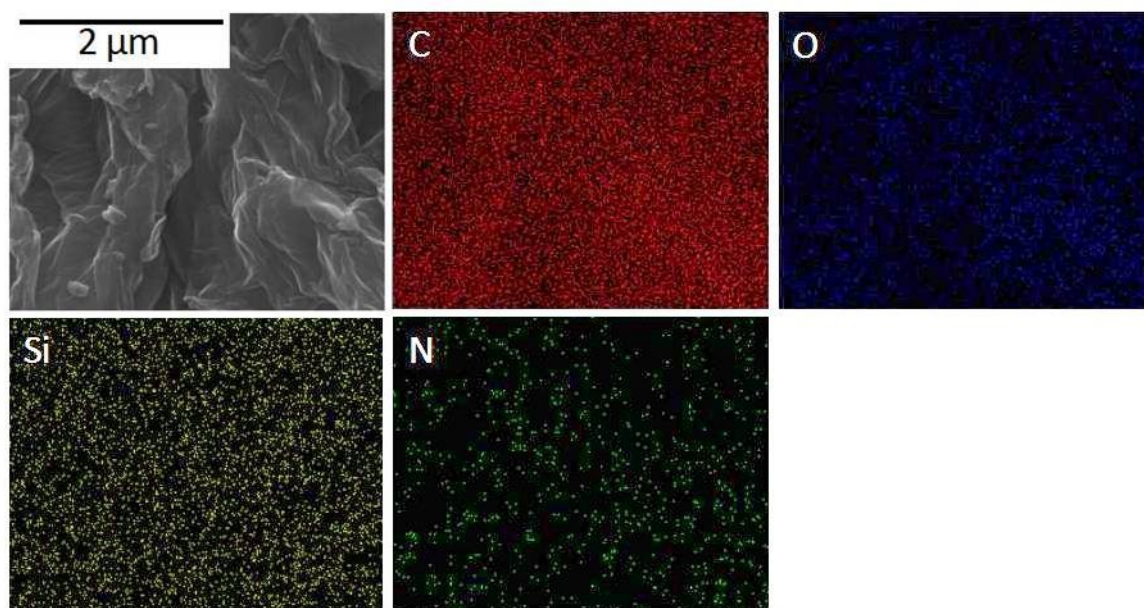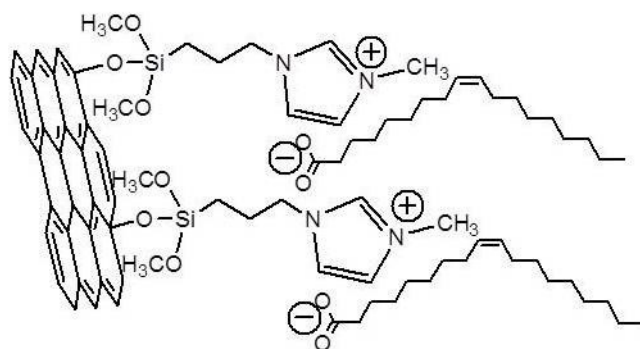

**Figure S3.** FESEM micrograph and corresponding element mapping images of Gr-OL hybrid nanomaterial along with its representative molecular structure. The element symbol is mentioned on each image.

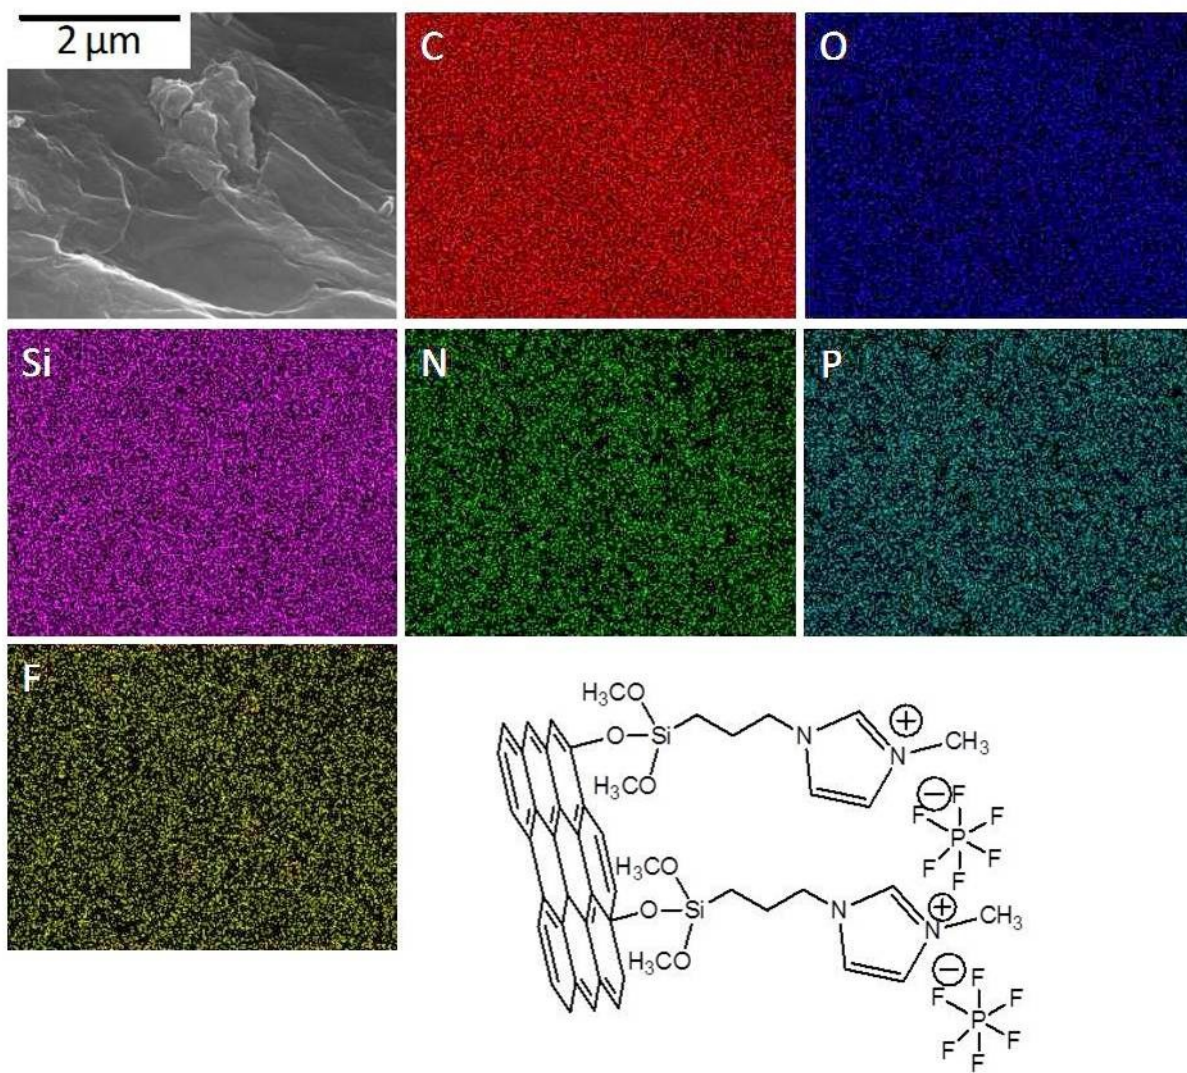

**Figure S4.** FESEM micrograph and corresponding element mapping images of Gr-PF<sub>6</sub> hybrid nanomaterial along with its representative molecular structure. The element symbol is mentioned on each image.

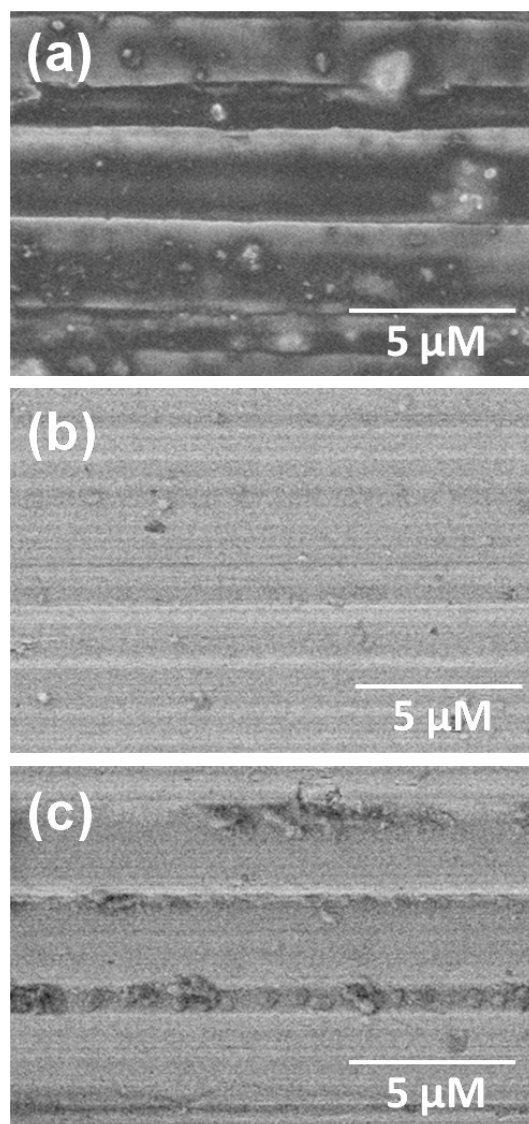

**Figure S5:** FESEM micrograph images of worn track of steel disc lubricated with (a) PEG and variable dose of Gr-BScB (b) 0.02 and (c) 0.05 mg.mL<sup>-1</sup> blended samples.

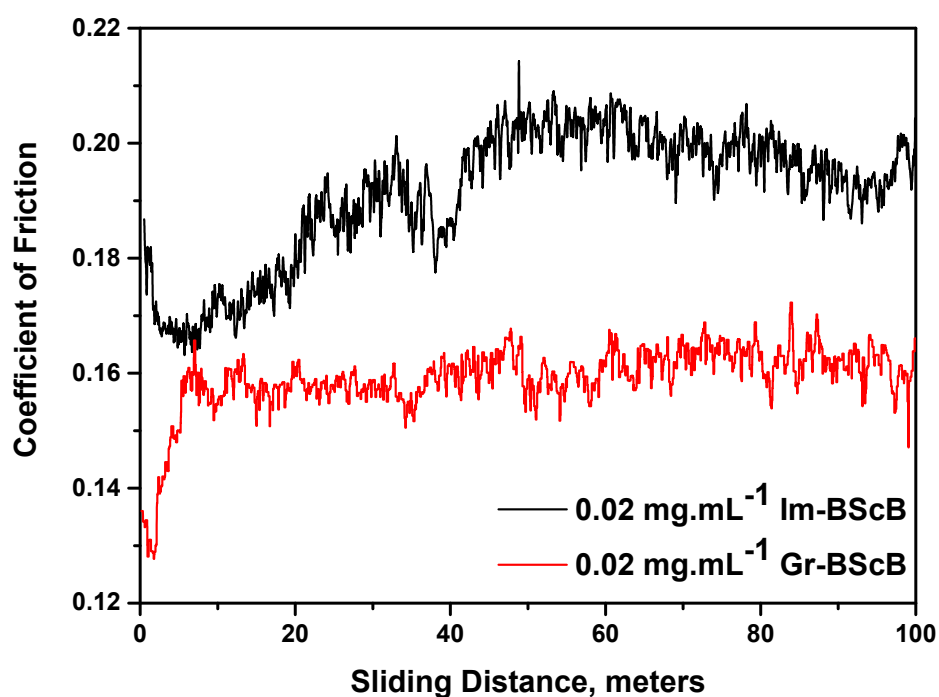

**Figure S6:** Changes in coefficient of friction as a function of individual blends of Im-BScB ionic liquid and Gr-BScB hybrid nanomaterial in PEG 200 ( $0.02 \text{ mg.mL}^{-1}$ ) under reciprocating sliding contact of steel tribo-pair. Load: 2 N, speed:  $3 \text{ cm.s}^{-1}$ , mean Hertzian contact pressure: 810 MPa

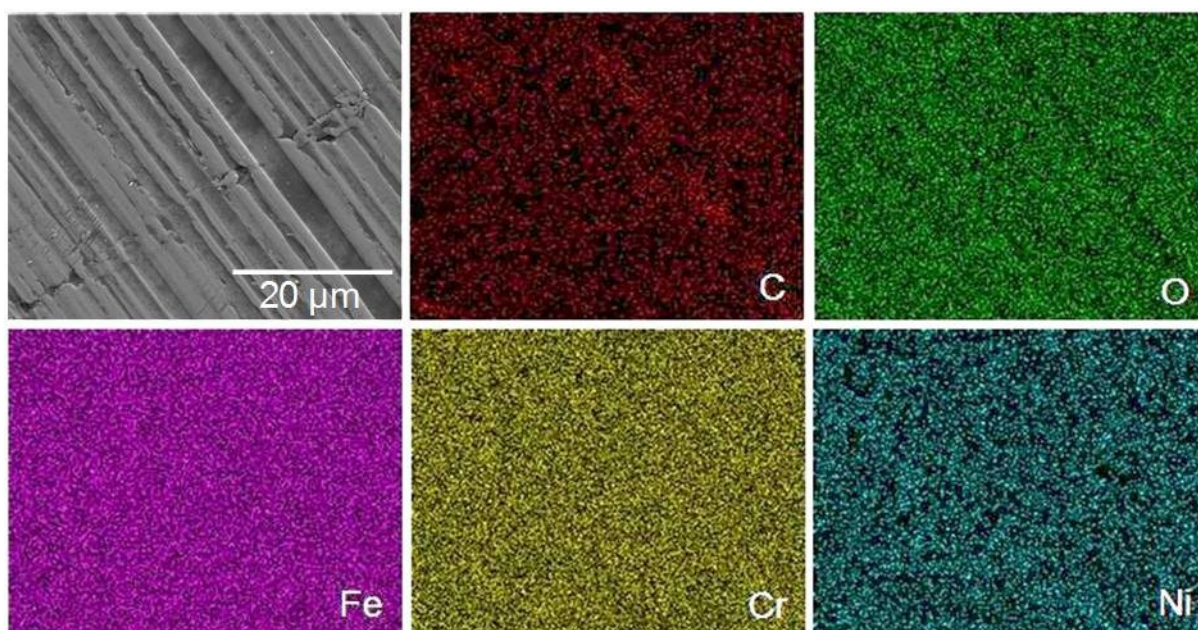

**Figure S7.** FESEM micrograph and corresponding element mapping images on the worn track of steel disc lubricated with PEG 200 lube base oil. Load: 2 N, speed: 1 cm.s<sup>-1</sup>, sliding distance: 100 meter.

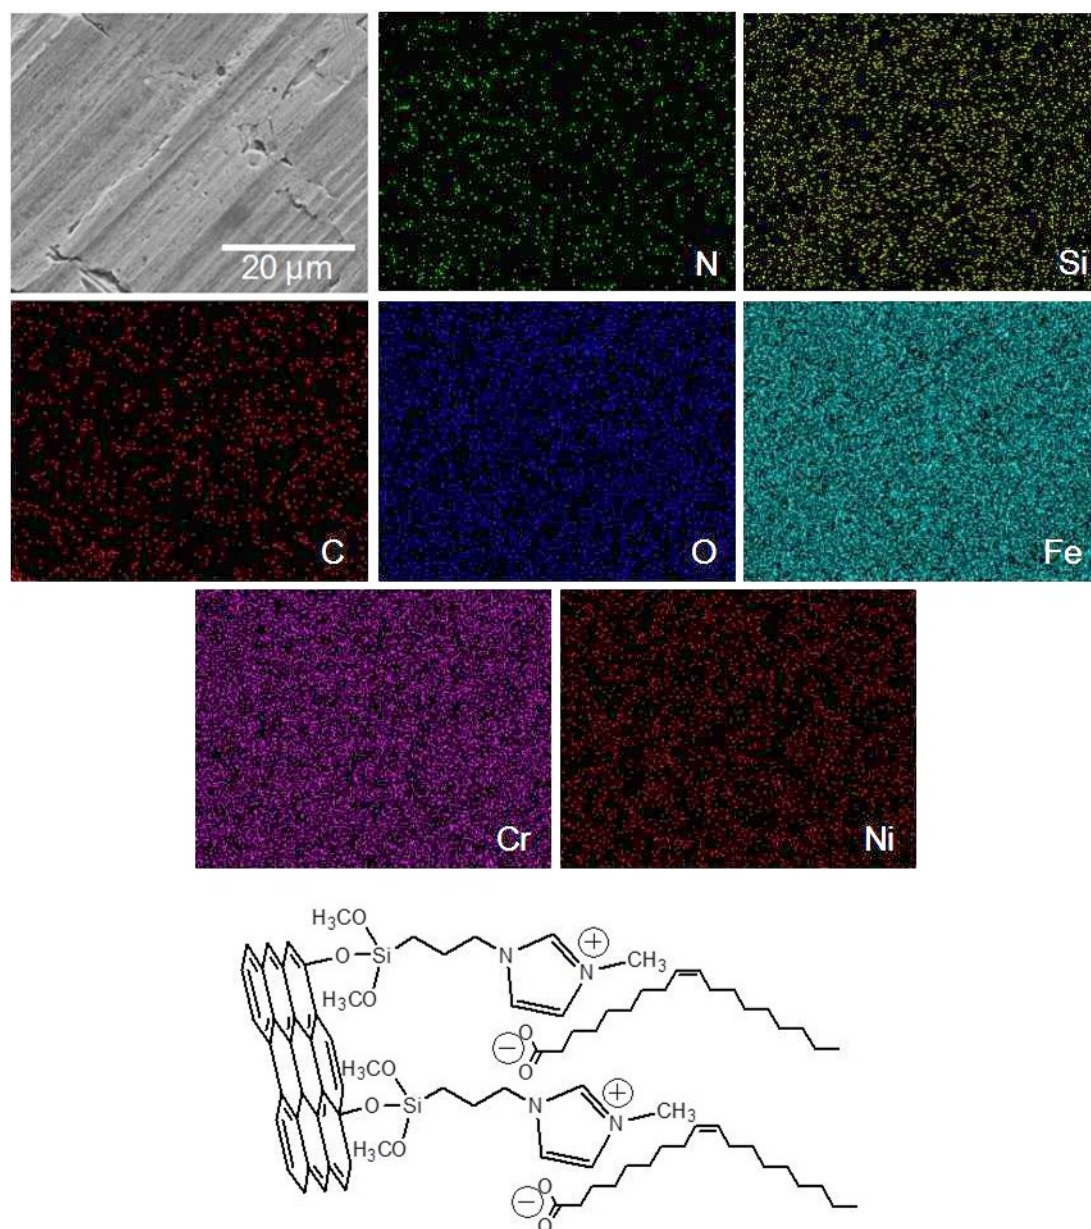

**Figure S8.** FESEM micrograph and corresponding element mapping images on the worn track of steel disc lubricated with Gr-OL blended with PEG 200 lube base oil (dose:  $0.02 \text{ mg.mL}^{-1}$ ). The uniform distribution of nitrogen and silicon on the worn track of steel disc revealed the contribution of Gr-OL hybrid nanomaterial in formation of tribo-thin film, which reduces the friction and wear. The representative molecular structure of Gr-OL is shown separately.

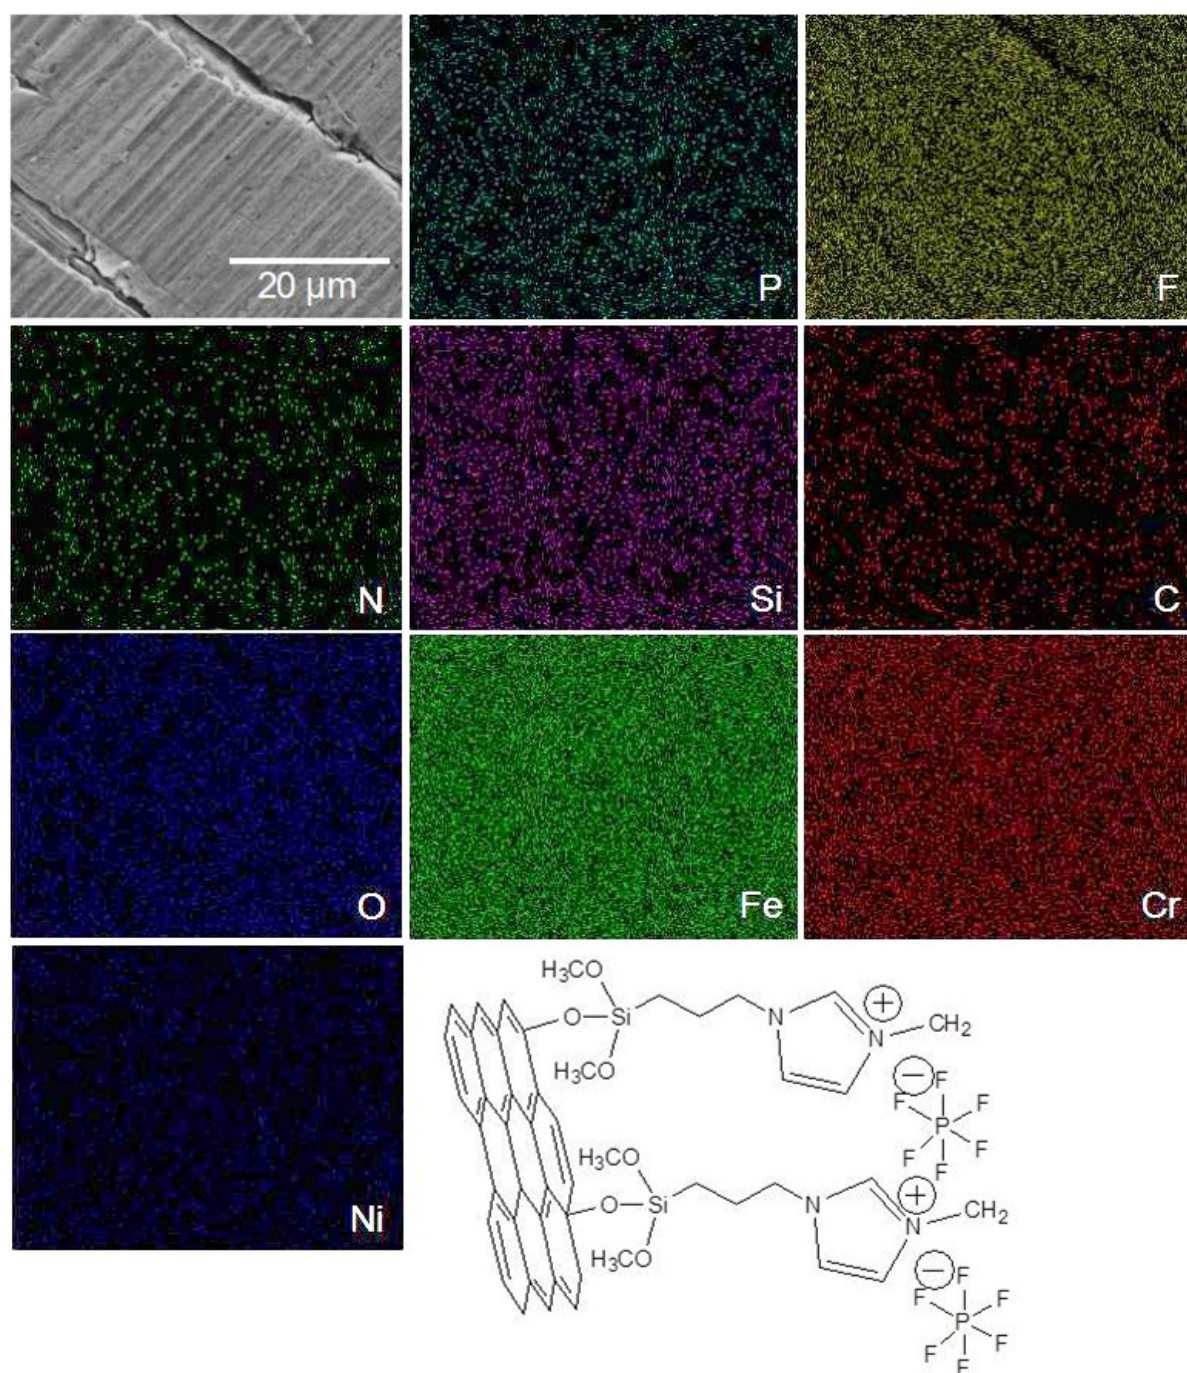

**Figure S9.** FESEM micrograph and corresponding element mapping images on the worn track of steel disc lubricated with Gr-PF<sub>6</sub> blended with PEG 200 lube base oil (dose: 0.02 mg.mL<sup>-1</sup>). The uniform distribution of phosphorus, fluorine, nitrogen and silicon on the worn track of steel disc revealed the contribution of Gr-PF<sub>6</sub> hybrid nanomaterial in formation of tribo-thin film, which reduces the friction and wear. The representative molecular structure of Gr- PF<sub>6</sub> is shown separately.

**Table S1.** Chemical composition of tribo-pair (Cr6 steel ball and 316 LN disc) used for friction measurement

| Element    | Elemental %    |                  |
|------------|----------------|------------------|
|            | Cr6 Steel Ball | 316LN Steel Disc |
| Carbon     | 0.98           | 0.03             |
| Silicon    | 0.2            | 1.0              |
| Nitrogen   | -              | 0.2              |
| Nickel     | -              | 12.6             |
| Manganese  | 0.32           | 2.0              |
| Phosphorus | 0.025          | 0.045            |
| Sulphur    | 0.015          | 0.03             |
| Chromium   | 1.43           | 17.2             |
| Molybdenum | 0.1            | 2.8              |
| Aluminium  | 0.05           | -                |
| Copper     | 0.3            | -                |
| Iron       | Balance        | Balance          |

**Table S2.** Mechanical properties of Cr6 steel ball and 316 LN disc used for friction measurement

| Specimen         | Tensile Strength, GPa | Yield Strength, GPa | Elasticity Modulus, GPa | Poisson's ratio |
|------------------|-----------------------|---------------------|-------------------------|-----------------|
| Cr6 Steel Ball   | 0.76                  | 0.45                | 200                     | 0.3             |
| 316LN Steel Disc | 0.51                  | 0.20                | 210                     | 0.28            |

**Table S3.** Physicochemical properties of PEG 200 and Gr-ILs blended samples#

| Sample Description                    | Kinematic Viscosity, mm <sup>2</sup> .s <sup>-1</sup> |          | Viscosity Index | Density at 40 °C, g.mL <sup>-1</sup> |
|---------------------------------------|-------------------------------------------------------|----------|-----------------|--------------------------------------|
|                                       | At 40 °C                                              | At 40 °C |                 |                                      |
| PEG 200                               | 22.204                                                | 4.138    | 76              | 1.1105                               |
| Gr-BScB Blend with PEG 200            | 22.215                                                | 4.1406   | 76              | 1.1103                               |
| Gr-OL Blend with PEG 200              | 22.214                                                | 4.1434   | 76              | 1.1102                               |
| Gr-PF <sub>6</sub> Blend with PEG 200 | 22.211                                                | 4.4384   | 76              | 1.1102                               |

#Concentration of each ionic liquid in the PEG 200 is 0.02 mg.mL<sup>-1</sup>

**Table S4:** Thermal % weight loss of GO, Gr-BScB, Gr-OL, and Gr-PF<sub>6</sub> as deduced from thermogravimetric pattern of respective sample.

| Sample Description | TGA Temperature for % Weight Loss, °C |       |       |
|--------------------|---------------------------------------|-------|-------|
|                    | 10%                                   | 20%   | 35%   |
| GO                 | 90.7                                  | 195.9 | 221.4 |
| Gr-BScB            | 296.4                                 | 378.1 | 463.3 |
| Gr-OL              | 247.3                                 | 321.0 | 409.3 |
| Gr-PF <sub>6</sub> | 200.7                                 | 290.6 | 302.6 |
